# Supplementary material
Source: PubMed Central journal article supplement (PMC4465212)

## Supplementary Appendix

This appendix has been provided by the authors to give readers additional information about their work.

Supplement to: The DCCT/EDIC Research Group. Intensive diabetes therapy and ocular surgery in type 1 diabetes. *N Engl J Med* 2015;372:1722-33. DOI: 10.1056/NEJMoa1409463

# Supplementary Appendix

## Intensive Diabetes Therapy and Ocular Surgery in Type 1 Diabetes

The Diabetes Control and Complications Trial (DCCT)-Epidemiology of Diabetes Interventions and Complications (EDIC) Research Group\*

### Table of Contents

1. The DCCT-EDIC Research Group
2. Schedule of Retinal Examinations
3. Supplemental Tables and Figures

#### 1. The DCCT-EDIC Research Group

The members of the DCCT-EDIC Research Group at the time of this publication follow.

*Study Chairpersons* – S. Genuth, D.M. Nathan, B. Zinman (vice-chair), O. Crofford (past)

#### Clinical Centers

*Albert Einstein College of Medicine* – J. Crandall (past), M. Reid (past), J. Brown-Friday (past), S. Engel (past), J. Sheindlin (past), M. Phillips (past), H. Martinez (past), H. Shamoon (past), H. Engel (past)

*Case Western Reserve University* – R. Gubitosi-Klug, L. Mayer, S. Pendegast, H. Zegarra, D. Miller, L. Singerman, S. Smith-Brewer, M. Novak, J. Quin (past), Saul Genuth (past), M. Palmert (past), E. Brown (past), J. McConnell (past), P. Pugsley (past), P. Crawford (past), W. Dahms (deceased)

*Weill Cornell Medical College* – D. Brillon, M.E. Lackaye, S. Kiss, R. Chan, A. Orlin, M. Rubin, V. Reppucci (past), T. Lee (past), M. Heinemann (past), S. Chang (past), B. Levy (past), L. Jovanovic (past), M. Richardson (past), B. Bosco (past), A. Dvoskin (past), R. Hanna (past), S. Barron (past), R. Campbell (deceased)

*Henry Ford Health System* – F. Whitehouse, D. Kruger, J.K. Jones, P.A. Edwards, A. Bhan, J.D. Carey, E. Angus, A. Thomas, M. McLellan (past), A. Galprin (past)

*International Diabetes Center* – R. Bergenstal, M. Johnson, K. Gunyou, K. Morgan, D. Kendall (past), M. Spencer (past), D. Etzwiler (deceased)

*Joslin Diabetes Center* – L.P. Aiello, E. Golden, P. Arrigg, V. Asuquo, R. Beaser, L. Bestourous, J. Cavallerano, R. Cavicchi, O. Ganda, O. Hamdy, R. Kirby, T. Murtha, D. Schlossman, S. Shah, G. Sharuk, P. Silva, P. Silver, M. Stockman, E. Weimann, H. Wolpert, L.M. Aiello (past), A. Jacobson (past), L. Rand (past), J. Rosenzweig (past)

*Massachusetts General Hospital* – D.M. Nathan, M.E. Larkin, M. Christofi, K. Folino, J. Godine, P. Lou, C. Stevens, E. Anderson (past), H. Bode (past), S. Brink (past), C. Cornish (past), D. Cros (past), L. Delahanty (past), A. deManbey (past), C. Haggan (past), J. Lynch (past), C. McKittrick (past), D. Norman (past), D. Moore (past), M. Ong (past), C. Taylor (past), D. Zimble (past), S. Crowell (past), S. Fritz (past), K. Hansen (past), C. Gauthier-Kelly (past)

*Mayo Foundation* – F.J. Service, G. Ziegler, R. Colligan, L. Schmidt (past), B. French (past), R. Woodwick (past), R. Rizza (past), W.F. Schwenk (past), M. Haymond (past), J. Pach (past), J. Mortenson (past), B. Zimmerman (deceased), A. Lucas (deceased)

*Medical University of South Carolina* – L. Luttrell, M. Lopes-Virella, S. Caulder, C. Pittman, N. Patel, K. Lee, M. Nutaitis, J. Fernandes, K. Hermayer, S. Kwon, A. Blevins, J. Parker, J. Colwell (past), D. Lee (past), J. Soule (past), P. Lindsey (past), M. Bracey (past), A. Farr (past), S. Elsing (past), T. Thompson (past), J. Selby (past), T. Lyons (past), S. Yacoub-Wasef (past), M. Szpiech (past), D. Wood (past), R. Mayfield (past)

*Northwestern University* – M. Molitch, B. Schaefer, L. Jampol, A. Lyon, M. Gill, Z. Strugula, L. Kaminski, R. Mirza, E. Simjanoski, D. Ryan, C. Johnson, A. Wallia, S. Ajroud-Driss, P. Astelford, N. Leloudes, A. Degillio

*University of California, San Diego* – O. Kolterman, G. Lorenzi, M. Goldbaum, K. Jones (past), M. Prince (past), M. Swenson (past), I. Grant (past), R. Reed (past), R. Lyon (past), M. Giotta (past), T. Clark (past), G. Friedenberg (deceased)

*University of Iowa* – W.I. Sivitz, B. Vittetoe, J. Kramer, M. Bayless (past), R. Zeitler (past), H. Schrott (past), N. Olson (past), L. Snetselaar (past), R. Hoffman (past), J. MacIndoe (past), T. Weingeist (past), C. Fountain (past)

*University of Maryland School of Medicine* – D. Counts, S. Johnsonbaugh, M. Patronas, M. Carney, P. Salemi (past), R. Liss (past), M. Hebdon (past), T. Donner (past), J. Gordon (past), R. Hemady (past), A. Kowarski (past), D. Ostrowski (past), S. Steidl (past), B. Jones (past)

*University of Michigan* – W.H. Herman, C.L. Martin, R. Pop-Busui, D.A. Greene (past), M.J. Stevens (past), N. Burkhart (past), T. Sandford (past), J. Floyd (deceased)

*University of Minnesota* – J. Bantle, N. Wimmergren, J. Terry, D. Koozekanani, S. Montezuma, B. Rogness (past), M. Mech (past), T. Strand (past), J. Olson (past), L. McKenzie (past), C. Kwong (past), F. Goetz (past), R. Warhol (past)

*University of Missouri* – D. Hainsworth, D. Goldstein, S. Hitt, J. Giangiaco (deceased)

*University of New Mexico* – D.S. Schade, J.L. Canady, M.R. Burge, A. Das, R.B. Avery, L.H. Ketai, J.E. Chapin, M.L Schluter (past) J. Rich (past), C. Johannes (past), D. Hornbeck (past)

*University of Pennsylvania* – M. Schutta, P.A. Bourne, A. Brucker, S. Braunstein (past), S. Schwartz (past), B.J. Maschak-Carey (past), L. Baker (deceased)

*University of Pittsburgh* – T. Orchard, L. Cimino, T. Songer, B. Doft, S. Olson, D. Becker, D. Rubinstein, R.L. Bergren, J. Fruit, R. Hyre, C. Palmer, N. Silvers (past), L. Lobes (past), P. Paczan Rath (past), P.W. Conrad (past), S. Yalamanchi (past), J. Wesche (past), M. Bratkowski (past), S. Arslanian (past), J. Rinkoff (past), J. Warnicki (past), D. Curtin (past), D. Steinberg (past), G. Vagstad (past), R. Harris (past), L. Steranchak (past), J. Arch (past), K. Kelly (past), P. Ostrosaka (past), M. Guiliani (past), M. Good (past), T. Williams (past), K. Olsen (past), A. Campbell (past), C. Shipe (past), R. Conwit (past), D. Finegold (past), and M. Zaucha (past), A. Drash (deceased)

*University of South Florida* – A. Morrison, J.I. Malone, M.L. Bernal, P.R. Pavan, N. Grove, E.A. Tanaka (past), D. McMillan (past), J. Vaccaro-Kish (past), L. Babbione (past), H. Solc (past), T.J. DeClue (past)

*University of Tennessee* – S. Dagogo-Jack, C. Wigley, H. Ricks, A. Kitabchi, E. Chaum, M.B. Murphy (past), S. Moser (past), D. Meyer (past), A. Iannacone (past), S. Yoser (past), M. Bryer-Ash (past), S. Schussler (past), H. Lambeth (past)

*University of Texas Southwestern Medical Center at Dallas* – P. Raskin, S. Strowig, M. Basco (past), S. Cercone (deceased)

*University of Toronto* – B. Zinman, A. Barnie, R. Devenyi, M. Mandelcorn, M. Brent, S. Rogers, A. Gordon, N. Bakshi, B. Perkins, L. Tuason, F. Perdikaris, R. Ehrlich (past), D. Daneman (past), K. Perlman (past), S. Ferguson (past)

*University of Washington* – J. Palmer, R. Fahlstrom, I.H.de Boer, J. Kinyoun, L. Van Ottingham, S. Catton (past), J. Ginsberg (past)

*University of Western Ontario* – J. Dupre, C. McDonald, J. Harth, M. Driscoll, T. Sheidow, J. Mahon (past), C. Canny (past), D. Nicolle (past), P. Colby (past), I. Hramiak (past), N.W. Rodger (past), M. Jenner (past), T. Smith (past), W. Brown (past)

*Vanderbilt University* – M. May, J. Lipps Hagan, A. Agarwal, T. Adkins, R. Lorenz (past), S. Feman (past), L. Survant (deceased)

*Washington University, St. Louis* – N.H. White, L. Levandoski, G. Grand, M. Thomas, D. Joseph, K. Blinder, G. Shah, D. Burgess (past), I. Boniuk (deceased), J. Santiago (deceased)

*Yale University School of Medicine* – W. Tamborlane, P. Gatcomb, K. Stoessel, P. Ramos, K. Fong, P. Ossorio, J. Ahern (past)

## **Clinical Coordinating Center**

*Case Western Reserve University* – R. Gubitosi-Klug, C. Beck, S. Genuth, J. Quin (past), P. Gaston (past), M. Palmert (past), R. Trail (past), W. Dahms (deceased)

## **Data Coordinating Center**

*George Washington University, The Biostatistics Center* – J. Lachin, P. Cleary, J. Backlund, I. Bebu, B. Braffett, L. Diminick, X. Gao, W. Hsu, K. Klumpp, P. McGee (past), W. Sun (past), S. Villavicencio (past), K. Anderson (past), L. Dews (past), Naji Younes (past), B. Rutledge (past), K. Chan (past), D. Rosenberg (past), B. Petty (past), A. Determan (past), D. Kenny (past), C. Williams (deceased)

## **National Institute of Diabetes and Digestive and Kidney Disease**

*National Institute of Diabetes and Digestive and Kidney Disease Program Office* – C. Cowie, C. Siebert (past)

## **Central Units**

*Central Biochemistry Laboratory (University of Minnesota)* – M. Steffes, V. Arends, J. Bucksa (past), M. Nowicki (past), B. Chavers (past)

*Central Carotid Ultrasound Unit (New England Medical Center)* – D. O’Leary, J. Polak, A. Harrington, L. Funk (past)

*Central ECG Reading Unit (University of Minnesota)* – R. Crow (past), B. Gloeb (past), S. Thomas (past), C. O’Donnell (past)

*Central ECG Reading Unit (Wake Forest University)* – E. Soliman, Z.M. Zhang, C. Campbell, L. Keasler, S. Hensley, R. Prineas (past)

*Central Neurologic Reading Center (University of Michigan, Mayo Clinic, Southern Illinois University)* – E.L. Feldman (past), J.W. Albers (past), P. Low (past), C. Sommer (past), K. Nickander (past), T. Spiegelberg (past), M. Pfiefer (past), M. Schumer (past), M. Moran (past), J. Farquhar (past)

*Central Neuropsychological Coding Unit (University of Pittsburgh)* – C. Ryan (past), D. Sandstrom (past), T. Williams (past), M. Geckle (past), E. Cupelli (past), F. Thoma (past), B. Burzuk (past), T. Woodfill (past)

*Central Ophthalmologic Reading Center (University of Wisconsin)* – R. Danis, B. Blodi, D. Lawrence, H. Wabers, S. Gangaputra (past), S. Neill (past), M. Burger (past), J. Dingledine (past), V. Gama (past), R. Sussman (past), M. Davis (past), L. Hubbard (past)

*Computed Tomography Reading Center (Harbor UCLA Research and Education Institute)* – M. Budoff, S. Darabian, P. Rezaeian, N. Wong (past), M. Fox (past), R. Oudiz (past), L. Kim (past), R. Detrano (past)

*Audiometry Reading Center (EpiSense, University of Wisconsin)* – K. Cruickshanks, D. Dalton, K. Bainbridge (*National Institute on Deafness and Other Communication Disorders*)

*Cardiac MR Reading Center (Johns Hopkins University, National Heart Lung and Blood Institute)* – J. Lima, D. Bluemke, E. Turkbey, R. J. van der Geest (past), C. Liu (past), A. Malayeri (past), A. Jain (past), C. Miao (past), H. Chahal (past), R. Jarboe (past)

*Editor, EDIC Publications* – D.M. Nathan

### **Collaborators**

*Advanced Glycation End Products (Case Western Reserve University)* – V. Monnier, D. Sell, C. Strauch

*Biomarkers (Cleveland Clinic)* – S. Hazen, A. Pratt, W. Tang

*Central Obesity Study (University of Washington)* – J. Brunzell, J. Purnell

*Epigenetics (Beckman Research Institute of City of Hope Medical Center)* – R. Natarajan, F. Miao, L. Zhang, Z. Chen

*Genetic Studies (Hospital for Sick Children)* – A. Paterson, A. Boright, S. Bull, L. Sun, S. Scherer (past)

*Molecular Risk Factors Program Project (Medical University of South Carolina)* – M. Lopes-Virella, T.J. Lyons, A. Jenkins, R. Klein, G. Virella, A. Jaffa, R. Carter, J. Stoner, W.T. Garvey (past), D. Lackland (past), M. Brabham (past), D. McGee (past), D. Zheng (past), R. K. Mayfield (past)

*SCOUT (Verelight)* – J. Maynard (past)

*UroEDIC (University of Washington, University of Michigan)* – H. Wessells, A. Sarma, A. Jacobson, R. Dunn, S. Holt, J. Hotaling, C. Kim, Q. Clemens, J. Brown (past), K. McVary (past)

## **2. Schedule of Retinal Examinations**

During EDIC, approximately, but not exactly, one-quarter of subjects had a retinal examination. To be precise, each patient had the retinal examination on the 4<sup>th</sup> year multiple anniversary of their year of enrollment into the DCCT. Thus, for example, a patient randomized in 1987 had subsequent retinal examinations in EDIC (starting in 1994) during 1995 (8<sup>th</sup> anniversary), 1999 (12<sup>th</sup> anniversary) etc. In addition, all subjects had the exam in 1997 (EDIC year 4) and 2003 (year 10).

### **3. Supplemental Tables and Figures**

Figure S1 presents the distribution (median and upper and lower quartiles) of HbA1c values during DCCT followed by the values at each successive year of EDIC.

Table S1 presents the characteristics of subjects at baseline (entry into the DCCT 1983-1989), the end (closeout) of the DCCT (1993) that also marks EDIC baseline, and at year 17 of EDIC (2010).

Table S2 presents the costs of ocular surgeries in DCCT-EDIC

Table S3 presents the incidence of ocular surgery within the DCCT intensive and conventional groups separately within the primary prevention cohort and the secondary intervention cohort.

Table S4 presents the hazard ratios for the conventional versus intensive group separately among males and females.

Table S5 presents the effects of covariates on the risk of surgeries and the proportion of the treatment group effect explained by each covariate separately for cataract surgery and for vitrectomy and/or retinal detachment surgery.

**Table S1. Clinical characteristics of DCCT-EDIC participants at DCCT baseline, DCCT closeout, and EDIC year 17.**

|                                            | DCCT Baseline (1983-1989)<br>(N=1441) |              | End of DCCT (1993)<br>(N=1418) * |              | EDIC Year 17 (~2010)<br>(N=1226) * |              |
|--------------------------------------------|---------------------------------------|--------------|----------------------------------|--------------|------------------------------------|--------------|
|                                            | INT                                   | CONV         | INT                              | CONV         | INT                                | CONV         |
| <b>N</b>                                   | 711                                   | 730          | 699                              | 719          | 628                                | 598          |
| <b>Medical history</b>                     |                                       |              |                                  |              |                                    |              |
| Age (years)                                | 27.1 (7.1)                            | 26.5 (7.1)   | 33.4 (7.0)                       | 32.8 (7.0) † | 51.3 (6.9)                         | 50.4 (6.8) † |
| Female (%)                                 | 48.5                                  | 45.9         | 49.1                             | 46.2         | 48.6                               | 45.9         |
| Diabetes duration (years)                  | 6.0 (4.2)                             | 5.7 (4.1)    | 12.1 (4.9)                       | 11.7 (4.8)   | 29.7 (4.9)                         | 29.2 (4.9)   |
| DCCT primary cohort (%)                    | 49.0                                  | 51.8         | 49.2                             | 51.7         | 48.7                               | 50.8         |
| Hypertension (%)                           | 3.1                                   | 2.1          | 5.0                              | 4.9          | 65.6                               | 66.2         |
| Hyperlipidemia (%) **                      | 22.8                                  | 23.3         | 26.2                             | 30.0         | 65.3                               | 63.2         |
| Current Cigarette smoking (%)              | 18.6                                  | 18.4         | 20.4                             | 19.6         | 12.9                               | 11.0         |
| <b>Medical treatment</b>                   |                                       |              |                                  |              |                                    |              |
| Glucose management                         |                                       |              |                                  |              |                                    |              |
| Pump or multiple daily injections (≥3) (%) | 0                                     | 0            | 97.4                             | 5.0‡         | 97.3                               | 96.8         |
| Glucose monitoring ≥ 4 times a day (%)     | 0                                     | 0            | 52.8                             | 3.8‡         | 67.3                               | 70.2         |
| RAAS (ACEI or ARB) use (%) §               | 0                                     | 0            | 0                                | 0            | 56.1                               | 57.2         |
| <b>Physical examination</b>                |                                       |              |                                  |              |                                    |              |
| Body mass index (kg/m <sup>2</sup> )       | 23.4 (2.7)                            | 23.5 (2.9)   | 26.6 (4.3)                       | 25.0 (3.1) ‡ | 29.4 (13.0)                        | 28.3 (4.7)   |
| Overweight (%)                             | 26.3                                  | 29.6         | 58.6                             | 47.1‡        | 73.6                               | 74.6         |
| Systolic blood pressure (mmHg)             | 114.5 (11.3)                          | 114.6 (11.4) | 116.5 (11.5)                     | 116.6 (11.9) | 122.1 (14.7)                       | 121.2 (14.9) |
| Diastolic blood pressure (mmHg)            | 73.1 (8.2)                            | 72.9 (8.7)   | 74.8 (8.7)                       | 74.4 (8.9)   | 72.5 (9.1)                         | 72.3 (8.8)   |
| <b>Laboratory values</b>                   |                                       |              |                                  |              |                                    |              |
| Hemoglobin A1c (%) ††                      | 9.1 (1.6)                             | 9.1 (1.6)    | 7.2 (0.9)                        | 9.1 (1.3) ‡  | 8.0 (1.1)                          | 8.0 (1.0)    |
| Plasma lipids (mg/dL)                      |                                       |              |                                  |              |                                    |              |
| Total Cholesterol                          | 177.1 (32.8)                          | 175.7 (33.6) | 180.3 (30.5)                     | 184.0 (37.6) | 173.5 (35.7)                       | 172.3 (40.0) |



|                                                 |              |              |              |               |             |             |
|-------------------------------------------------|--------------|--------------|--------------|---------------|-------------|-------------|
| HDL Cholesterol                                 | 50.8 (12.3)  | 50.3 (12.3)  | 51.0 (12.9)  | 51.8 (13.1)   | 61.6 (19.0) | 60.8 (17.8) |
| LDL Cholesterol                                 | 110.3 (28.7) | 109.1 (29.4) | 112.5 (27.1) | 114.9 (32.0)  | 95.9 (29.6) | 95.3 (29.8) |
| Triglycerides                                   | 80.8 (43.3)  | 81.8 (51.3)  | 84.2 (52.6)  | 88.6 (51.4) † | 80.0 (45.8) | 81.3 (74.6) |
| <b>Complications</b>                            |              |              |              |               |             |             |
| <b>Eye</b>                                      |              |              |              |               |             |             |
| Retinopathy levels                              |              |              |              | ‡             |             | ‡           |
| No Retinopathy (10/10)                          | 49.0         | 51.8         | 28.4         | 17.1          | 9.4         | 4.9         |
| MA Only (20/(<)20)                              | 35.0         | 27.8         | 39.5         | 32.3          | 40.1        | 27.6        |
| Mild NPDR (35/(<)35)                            | 11.5         | 15.2         | 21.5         | 28.6          | 23.1        | 17.9        |
| Moderate/Severe NPDR (43/<43 – 53/53)           | 4.5          | 5.2          | 8.3          | 15.8          | 18.2        | 25.4        |
| PDR (60/60 +)                                   | 0            | 0            | 2.4          | 6.3           | 9.2         | 24.3        |
| CSME (%)                                        | 0            | 0            | 3.4          | 6.8‡          | 12.6        | 21.2‡       |
| Visual acuity in the worse eye                  |              |              |              | ‡             |             | †           |
| ≤20/20                                          | 83.8         | 84.4         | 86.7         | 82.5          | 66.6        | 60.4        |
| >20/20 - < 20/40                                | 16.2         | 15.6         | 12.9         | 16.0          | 29.0        | 32.8        |
| 20/40 - < 20/100                                | 0            | 0            | 0.4          | 1.3           | 2.6         | 4.7         |
| ≥20/100                                         | 0            | 0            | 0            | 0.3           | 1.9         | 2.2         |
| <b>Renal</b>                                    |              |              |              |               |             |             |
| Sustained AER ≥ 30 mg/24hr (%)                  | 5.2          | 4.3          | 7.6          | 14.6‡         | 11.2        | 18.4‡       |
| AER ≥ 300 mg/24 hr (%)                          | 0            | 0            | 1.4          | 3.2†          | 4.0         | 6.5†        |
| eGFR (mL/min/1.73m <sup>2</sup> )               | 126.0 (13.9) | 126.2 (14.6) | 116.0(13.0)  | 117.8(13.7) ‡ | 94.1 (18.0) | 93.0 (19.5) |
| Sustained eGFR<60 mL/min/1.73m <sup>2</sup> (%) | 0            | 0            | 0.1          | 0.4           | 3.3         | 4.9         |
| <b>Neuropathy</b>                               |              |              |              |               |             |             |
| Confirmed clinical neuropathy                   | 6.8          | 5.6          | 9.3          | 17.5‡         | 24.2        | 31.9‡       |

Values are reported as either mean (SD) or %.

\* Ocular surgery was ascertained in 1418 subjects at DCCT closeout and 1,227 subjects at EDIC year 17. If a characteristic was not assessed at EDIC year 17, the value from the most recent visit was employed.

†  $p < 0.05$  by the Wilcoxon rank-sum test for group differences in quantitative or ordinal characteristics, or by the chi-square test for categorical variables.

‡  $p < 0.01$  by the Wilcoxon rank-sum test for group differences in quantitative or ordinal characteristics, or by the chi-square test for categorical variables.

|| Hypertension was defined by a systolic blood pressure  $\geq 140$  mmHg, diastolic blood pressure  $\geq 90$  mmHg, or use of antihypertensive medications.

\*\* Hyperlipidemia was defined by an LDL cholesterol level  $\geq 130$  mg per deciliter (3.4 mmol per liter) or the use of lipid-lowering agents.

†† End of DCCT hemoglobin A1c is the mean of the quarterly hemoglobin A1c values throughout the DCCT. EDIC Year 17 hemoglobin A1c is the mean of the annual EDIC hemoglobin A1c values. DCCT-EDIC weighted mean hemoglobin A1c is the time-averaged HbA1c of DCCT quarterly values (weight  $\frac{1}{4}$ ) and EDIC annual values (weight 1), with mean (SD) values 7.8% (0.9%) and 8.3% (1.0%) among participants assigned to intensive and conventional diabetes therapy, respectively.

§ Medication data were not collected during the DCCT. ACE inhibitors were prohibited during the DCCT. At EDIC year 1, ACEI use was 5.6% in INT and 6.9% in CONV. ARBs were not available until later during EDIC.

Abbreviations: DCCT = Diabetes Control and Complications Trial; EDIC = Epidemiology of Diabetes Interventions and Complications Study; INT = intensive diabetes therapy; CONV = conventional diabetes therapy; RAAS = renin-angiotensin-aldosterone system; ACEI = angiotensin receptor blocker; ARB = angiotensin II receptor blocker; HDL = high density cholesterol; LDL = low density cholesterol.

**Table S2. Cost Estimate of Ocular Surgeries in DCCT and EDIC by Treatment Group in 2010 dollars without and with adjustment for inflation (discounting) at 3% per year. <sup>19,20</sup>**

| <b>Ocular Surgery Category</b>                                           | <b>Total Cost (\$)</b> |                     |
|--------------------------------------------------------------------------|------------------------|---------------------|
|                                                                          | <b>Intensive</b>       | <b>Conventional</b> |
| <b>Cataract surgery - 2010 prices</b>                                    | 227,355                | 296,550             |
| <b>Cataract surgery - inflation adjusted prices</b>                      | 199,444                | 263,405             |
| <b>Vitrectomy/Retinal detachment surgery - 2010 prices</b>               | 269,619                | 473,655             |
| <b>Vitrectomy/Retinal detachment surgery - inflation adjusted prices</b> | 225,244                | 364,732             |
| <b>Glaucoma related surgery - 2010 prices</b>                            | 5,280                  | 8,096               |
| <b>Glaucoma related surgery - inflation adjusted prices</b>              | 4,781                  | 6,789               |
| <b>Total cost of ocular surgery - 2010 prices</b>                        | 502,254                | 778,301             |
| <b>Total cost of ocular surgery - inflation adjusted prices</b>          | 429,469                | 634,925             |

**Table S3. Count of ocular surgeries during DCCT and EDIC follow-up among the 726 participants in the primary cohort on entry and 715 participants in the secondary cohort. A test of the interaction between cohort and treatment group in any complication-related surgery (i.e. a test of homogeneity) is not significant (p=0.65)**

**A. Primary Prevention Cohort**

|                                                 | Number (%) of Subjects with Ocular Surgeries |                                       | Incidence Rate Per 1000 Patient-years |                               | Risk Reduction (% , 95% CI)* | P value     |
|-------------------------------------------------|----------------------------------------------|---------------------------------------|---------------------------------------|-------------------------------|------------------------------|-------------|
|                                                 | Intensive Diabetes Therapy (N=348)           | Conventional Diabetes Therapy (N=378) | Intensive Diabetes Therapy            | Conventional Diabetes Therapy |                              |             |
| <b>Any diabetes-related ocular surgery</b>      | 20 (5.7%)                                    | 32 (8.5%)                             | 2.60                                  | 3.98                          | 45.3 (3.8, 68.9)             | <b>0.04</b> |
| <b>Cataract surgery</b>                         | 10 (2.9%)                                    | 19 (5.0%)                             | 1.29                                  | 2.34                          | 56.0 (5.5, 79.5)             | <b>0.04</b> |
| <b>Vitrectomy or retinal detachment surgery</b> | 13 (3.7%)                                    | 14 (3.7%)                             | 1.68                                  | 1.72                          |                              |             |
| <b>Glaucoma-related surgery</b>                 | 1 (0.3%)                                     | 6 (1.6%)                              | 0.13                                  | 0.73                          |                              |             |
| <b>Corneal-related surgery</b>                  | 1 (0.3%)                                     | 1 (0.3%)                              | 0.13                                  | 0.12                          |                              |             |
| <b>Eye enucleation</b>                          | 0 (0%)                                       | 0 (0%)                                | 0                                     | 0                             |                              |             |
| <b>YAG posterior capsulotomy</b>                | 1 (0.3%)                                     | 2 (0.5%)                              | 0.13                                  | 0.24                          |                              |             |
| <b>N (%) of subjects with</b>                   |                                              |                                       |                                       |                               |                              |             |
| <b>0 ocular surgeries</b>                       | 328 (94.3%)                                  | 346 (91.5%)                           |                                       |                               |                              |             |
| <b>1 surgery type</b>                           | 15 (4.3%)                                    | 26 (6.9%)                             |                                       |                               |                              |             |
| <b>2 surgery types</b>                          | 5 (1.4%)                                     | 4 (1.1%)                              |                                       |                               |                              |             |
| <b>3 surgery types</b>                          | 0 (0%)                                       | 2 (0.5%)                              |                                       |                               |                              |             |
| <b>Trend P value</b>                            | 0.19                                         |                                       |                                       |                               |                              |             |

## B. Secondary Intervention Cohort

|                                                 | Number (%) of Subjects with Ocular Surgeries |                                       | Incidence Rate Per 1000 Patient-years |      | Risk Reduction (% , 95% CI) † | P value          |
|-------------------------------------------------|----------------------------------------------|---------------------------------------|---------------------------------------|------|-------------------------------|------------------|
|                                                 | Intensive Diabetes Therapy (N=363)           | Conventional Diabetes Therapy (N=352) |                                       |      |                               |                  |
| <b>Any diabetes-related ocular surgery</b>      | 43 (11.8%)                                   | 66 (18.8%)                            | 5.21                                  | 8.60 | 51.0 (27.5,66.9)              | <b>&lt;0.001</b> |
| <b>Cataract surgery</b>                         | 32 (8.8%)                                    | 42 (11.9%)                            | 3.83                                  | 5.29 | 45.7 (11.5,66.6)              | <b>0.02</b>      |
| <b>Vitrectomy or retinal detachment surgery</b> | 16 (4.4%)                                    | 36 (10.2%)                            | 1.91                                  | 4.62 | 59.8 (27.4,77.8)              | <b>0.003</b>     |
| <b>Glaucoma-related surgery</b>                 | 8 (2.2%)                                     | 8 (2.3%)                              | 0.95                                  | 0.99 |                               |                  |
| <b>Corneal-related surgery</b>                  | 1 (0.3%)                                     | 2 (0.6%)                              | 0.12                                  | 0.25 |                               |                  |
| <b>Eye enucleation</b>                          | 1 (0.3%)                                     | 1 (0.3%)                              | 0.12                                  | 0.12 |                               |                  |
| <b>YAG posterior capsulotomy</b>                | 2 (0.6%)                                     | 2 (0.6%)                              | 0.24                                  | 0.25 |                               |                  |
| <b>N (%) of subjects with</b>                   |                                              |                                       |                                       |      |                               |                  |
| <b>0 ocular surgeries</b>                       | 320 (88.2%)                                  | 286 (81.3%)                           |                                       |      |                               |                  |
| <b>1 surgery type</b>                           | 32 (8.8%)                                    | 47 (13.4%)                            |                                       |      |                               |                  |
| <b>2 surgery types</b>                          | 7 (1.9%)                                     | 16 (4.6%)                             |                                       |      |                               |                  |
| <b>3 surgery types</b>                          | 4 (1.1%)                                     | 3 (0.9%)                              |                                       |      |                               |                  |
| <b>Trend P value</b>                            | 0.024                                        |                                       |                                       |      |                               |                  |

\*Time to the first of any complication-related ocular surgery was the primary study outcome. For those patients with multiple ocular surgery types, time to the onset of the first surgery of each type was used. All of the surgeries occurred in EDIC except for 6 during DCCT including 1 glaucoma-related surgery (intensive), 2 cataract extraction (conventional), 2 vitrectomy surgeries (conventional), and 1 enucleation (conventional).

† Risk reduction associated with intensive diabetes therapy is calculated as  $(1 - \text{hazard ratio of intensive versus conventional diabetes therapy}) \times 100\%$ . Hazard ratio is generated from a Cox proportional hazards model adjusting for age, gender, diabetes duration, HbA1c and visual acuity level at DCCT baseline.

**Table S4. Conventional versus intensive group hazard ratios for any complication-related ocular surgery, cataract surgery, and vitrectomy or retinal detachment surgery by gender, with the p-value from a test of homogeneity (no treatment by gender interaction).**

| <b>Surgery*</b>            | <b>Gender</b> | <b>Hazard Ratio</b>  | <b>p value</b> | <b>Homogeneity p-value</b> |
|----------------------------|---------------|----------------------|----------------|----------------------------|
| <b>Any Surgery</b>         | Male          | 2.560 (1.550, 4.228) | <b>0.0002</b>  | 0.15                       |
|                            | Female        | 1.584 (1.032, 2.429) | <b>0.0352</b>  |                            |
| <b>Cataract Extraction</b> | Male          | 2.649 (1.382, 5.077) | <b>0.0033</b>  | 0.23                       |
|                            | Female        | 1.591 (0.943, 2.687) | 0.0821         |                            |
| <b>Vitrectomy</b>          | Male          | 3.58 (1.69, 7.58)    | <b>0.0009</b>  | 0.02                       |
|                            | Female        | 1.07 (0.58, 1.97)    | 0.8412         |                            |

\* Cox proportional hazards models adjusting for age, gender, treatment by gender interaction, diabetes duration, HbA1c, secondary versus primary cohort and visual acuity level at DCCT baseline were used to examine each surgery type.

**Table S5. Association of HbA1c and complications as time-dependent covariates with the risk of surgery in separate Cox proportional hazards models. The proportion of the treatment group differences explained by each covariate on the incidence of surgery is also shown. A) cataract surgery; B) vitrectomy and/or retinal detachment surgery.**

**A. Cataract surgery.**

| <b>Model*</b>                                                         | <b>Time-Dependent Covariate Hazard Ratio (95% CI) †</b> | <b>P value</b>  | <b>Risk reduction (%) of intensive diabetes therapy (95% CI) ‡</b> | <b>P value</b> | <b>Proportion of treatment effect explained by each covariate§</b> |
|-----------------------------------------------------------------------|---------------------------------------------------------|-----------------|--------------------------------------------------------------------|----------------|--------------------------------------------------------------------|
| <b>Intensive vs. conventional group</b>                               | ---                                                     | ---             | 48.5 (22.7, 65.7)                                                  | <b>0.001</b>   |                                                                    |
| <b>Updated DCCT-EDIC time-weighted mean HbA1c: (Per 10% increase)</b> | 1.71 (1.42, 2.04)                                       | <b>&lt;.001</b> | 8.68 (-44.5, 42.3)                                                 | 0.70           | 98.5%                                                              |
| <b>Retinopathy: Moderate NPDR or worse vs Mild NPDR or better</b>     | 3.40 (2.05, 5.64)                                       | <b>&lt;.001</b> | 26.0 (-16.0, 52.8)                                                 | 0.19           | 83.2%                                                              |
| <b>CSME</b>                                                           | 2.95 (1.88, 4.65)                                       | <b>&lt;.001</b> | 36.8 (2.2, 59.1)                                                   | <b>0.04</b>    | 58.6%                                                              |
| <b>Visual acuity: ≤ 20/20 vs. &gt;20/20</b>                           | 6.21 (3.78, 10.20)                                      | <b>&lt;.001</b> | 37.5 (6.1, 58.4)                                                   | <b>0.03</b>    | 50.2%                                                              |
| <b>AER</b>                                                            | 1.03 (1.02, 1.04)                                       | <b>&lt;.001</b> | 40.5 (9.3, 60.9)                                                   | <b>0.02</b>    | 43.2%                                                              |
| <b>Sustained AER&gt;30 mg/24 hr</b>                                   | 2.34 (1.47, 3.73)                                       | <b>0.004</b>    | 41.5 (10.6, 61.7)                                                  | <b>0.02</b>    | 40.3%                                                              |
| <b>AER&gt;300 mg/24 hr</b>                                            | 3.63 (2.04, 6.47)                                       | <b>&lt;.001</b> | 42.7 (13.0, 62.3)                                                  | <b>0.009</b>   | 33.6%                                                              |
| <b>Hypertension</b>                                                   | 2.79 (1.63, 4.80)                                       | <b>0.002</b>    | 43.0 (14.3, 62.1)                                                  | <b>0.007</b>   | 28.9%                                                              |
| <b>RAAS inhibitor use</b>                                             | 1.85 (1.13, 3.00)                                       | <b>0.02</b>     | 45.8 (18.2, 64.1)                                                  | <b>0.004</b>   | 17.3%                                                              |
| <b>eGFR (per 1 std: 18 mL/min/1.73m<sup>2</sup> increase)</b>         | 0.71 (0.61, 0.82)                                       | <b>&lt;.001</b> | 43.8 (14.7, 63.0)                                                  | <b>0.007</b>   | 28.5%                                                              |

|                                                      |                   |                 |                   |                  |       |
|------------------------------------------------------|-------------------|-----------------|-------------------|------------------|-------|
| <b>Sustained eGFR&gt;60 mL/min/1.73m<sup>2</sup></b> | 3.75 (2.02, 6.94) | <b>&lt;.001</b> | 44.3 (15.3, 63.3) | <b>0.006</b>     | 27.3% |
| <b>Confirmed clinical neuropathy</b>                 | 2.18 (1.39, 3.40) | <b>0.006</b>    | 45.8 (18.4, 64.0) | <b>&lt;0.001</b> | 16.4% |



**B. Vitrectomy and/or retinal detachment surgery.**

| <b>Model*</b>                                                         | <b>Time-Dependent Covariate Hazard Ratio (95% CI) †</b> | <b>P value</b>  | <b>Risk reduction (%) of intensive diabetes therapy (95% CI) ‡</b> | <b>P value</b> | <b>Proportion of treatment effect explained by each covariate§</b> |
|-----------------------------------------------------------------------|---------------------------------------------------------|-----------------|--------------------------------------------------------------------|----------------|--------------------------------------------------------------------|
| <b>Intensive vs. conventional group</b>                               | ---                                                     | ---             | 45.4 (12.5, 65.9)                                                  | <b>0.010</b>   |                                                                    |
| <b>Updated DCCT-EDIC time-weighted mean HbA1c: (Per 10% increase)</b> | 1.71 (1.43, 2.04)                                       | <b>&lt;.001</b> | -64.5 (-209.6, 12.5)                                               | 0.13           | 62.3%                                                              |
| <b>Retinopathy: Moderate NPDR or worse vs Mild NPDR or better</b>     | 31.14 (13.18, 73.56)                                    | <b>&lt;.001</b> | -9.1 (-74.8, 31.9)                                                 | 0.72           | 97.9%                                                              |
| <b>CSME</b>                                                           | 9.3 (5.2, 16.6)                                         | <b>&lt;.001</b> | 23.3 (-23.5, 52.4)                                                 | 0.28           | 81.2%                                                              |
| <b>Visual acuity: ≤ 20/20 vs. &gt; 20/20</b>                          | 6.2 (3.7, 10.3)                                         | <b>&lt;.001</b> | 35.9 (-2.9, 60.1)                                                  | 0.07           | 46.3%                                                              |
| <b>AER</b>                                                            | 1.05 (1.03, 1.06)                                       | <b>&lt;.001</b> | 28.3 (-17.2, 56.1)                                                 | 0.19           | 72.3%                                                              |
| <b>Sustained AER&gt;30 mg/24 hr</b>                                   | 5.11 (3.04, 8.59)                                       | <b>&lt;.001</b> | 29.7 (-14.9, 57)                                                   | 0.17           | 68.8%                                                              |
| <b>AER&gt;300 mg/24 hr</b>                                            | 5.20 (2.85, 9.50)                                       | <b>&lt;.001</b> | 35.6 (-5.9, 60.9)                                                  | 0.09           | 52.7%                                                              |
| <b>Hypertension</b>                                                   | 5.7 (3.2, 10.4)                                         | <b>&lt;.001</b> | 37.5 (-0.2, 61)                                                    | 0.06           | 39.8%                                                              |
| <b>RAAS inhibitor use</b>                                             | 3.27 (1.95, 5.48)                                       | <b>&lt;.001</b> | 39.8 (3.7, 62.3)                                                   | <b>0.04</b>    | 29.3%                                                              |
| <b>eGFR (per 1 std: 18 mL/min/1.73m<sup>2</sup> increase)</b>         | 0.72 (0.60, 0.87)                                       | <b>0.004</b>    | 41.5 (4.9, 64)                                                     | <b>0.04</b>    | 25.9%                                                              |
| <b>Sustained eGFR&gt;60 mL/min/1.73m<sup>2</sup></b>                  | 4.11 (1.61, 10.54)                                      | <b>0.004</b>    | 43.1 (7.9, 64.9)                                                   | <b>0.03</b>    | 16.7%                                                              |
| <b>Confirmed clinical neuropathy</b>                                  | 2.23 (1.21, 4.11)                                       | <b>0.006</b>    | 43.2 (7.9, 65)                                                     | <b>0.03</b>    | 17.0%                                                              |

\* Cox proportional hazards models adjusting for age, gender, diabetes duration, HbA1c, secondary versus primary cohort and visual acuity level at DCCT baseline. Separate models examine the adjusted effect of treatment group alone, then each time-dependent covariate individually, one at a time, and then both treatment group and the covariate. All models use the Lin-Wei robust estimate of the covariate standard errors, confidence limits and p-values.

† Hazard ratio is evaluated per 10% increase in updated mean HbA1c, or one standard deviation increase in eGFR (18 mL/min/1.73m<sup>2</sup>), or for yes versus no for qualitative covariates.

‡ Risk reduction associated with intensive diabetes therapy is calculated as (1 - hazard ratio of intensive versus conventional diabetes therapy) x 100%. A negative risk reduction estimate corresponds to a non-significant risk increase and designates that all of the treatment group difference is explained by the covariate.

§ The proportion of the treatment group effect explained is the percentage change in the treatment group chi-square test value in the Cox model without and then with adjustment for the covariate.

Abbreviations: DCCT = Diabetes Control and Complications Trial; CI = confidence interval, AER = albumin excretion rate, RAAS = renin-angiotensin-aldosterone system.

**Figure S1. Distribution of HbA1c during the DCCT and then annually during each successive year of EDIC through year 17. Presented are the mean (+), median (-), upper and lower quartiles (the box) and the extreme 5 and 95 percentile values (whiskers).**

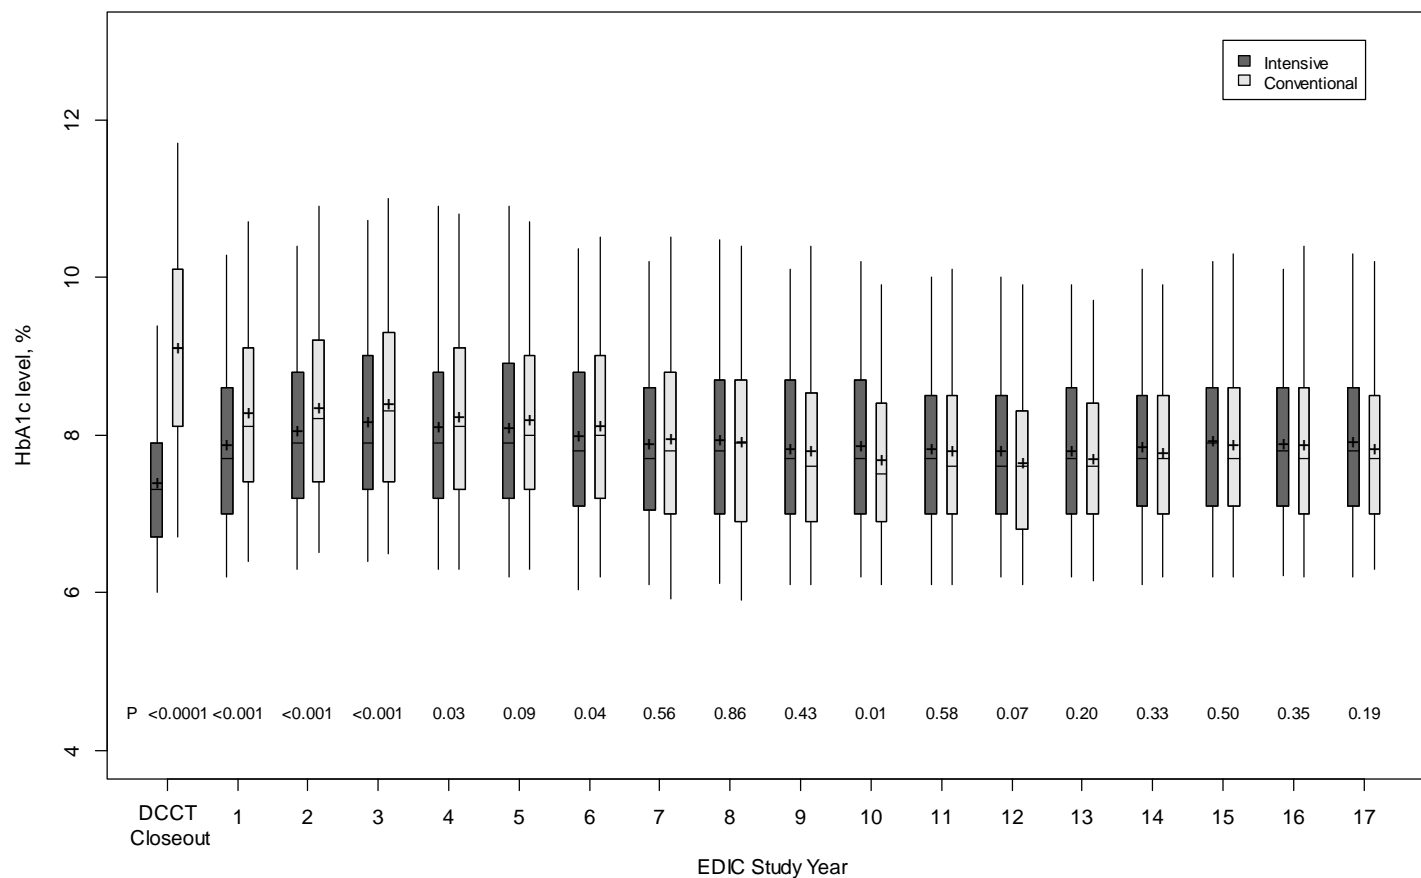

Supplement: NIHMS696942-supplement-Supplement1.pdf [file NIHMS696942-supplement-Supplement1.pdf]
